# Supplementary material for: Serum Leucine-Rich Alpha-2 Glycoprotein in Quiescent Crohn’s Disease as a Potential Surrogate Marker for Small-Bowel Ulceration detected by Capsule Endoscopy
Source: MDPI journal article supplement (doi:10.3390/jcm11092494), 2022-04-29
Supplement: s1 [file s1]

**Supplementary Table S1.** Comparison of the patients with and without small bowel ulcer (>0.5 cm)

|                               |                          | <b>Total<br/><i>n</i>=40</b> | <b>Presence of small-<br/>bowel ulcer,<br/>≥0.5 cm<br/><i>n</i>=11</b> | <b>Absence of small-<br/>bowel ulcer,<br/>≥0.5 cm<br/><i>n</i>=29</b> | <b><i>p</i>-value</b> |
|-------------------------------|--------------------------|------------------------------|------------------------------------------------------------------------|-----------------------------------------------------------------------|-----------------------|
| SBCE score                    | Lewis score              | 0 (0–192)                    | 339 (135–3503)                                                         | 0 (0–0)                                                               | <0.0001               |
|                               | CECDAI                   | 3 (0–6)                      | 8 (3–12)                                                               | 3 (0–6)                                                               | 0.0012                |
|                               | CDACE                    | 211 (0–420]                  | 730 (310–940)                                                          | 210 (0–370)                                                           | 0.0003                |
| Biomarkers/clinical activity: |                          |                              |                                                                        |                                                                       |                       |
|                               | Hb, g/dL                 | 13.7 (12.2–14.7)             | 13.9 (12.3–14.6)                                                       | 13.7 (12.2–14.8)                                                      | 0.9396                |
|                               | Plt ×10 <sup>4</sup> /μL | 24.6 (21.1–29.2)             | 24.9 (23.6–26.5)                                                       | 23.5 (20.7–29.7)                                                      | 0.4579                |
|                               | Alb, g/dL                | 4.4 (4.2–4.7)                | 4.3 (4–4.7)                                                            | 4.5 (4.2–4.7)                                                         | 0.1737                |
|                               | CRP, mg/dL               | 0.08 (0.05–0.15)             | 0.09 (0.06–0.18)                                                       | 0.08 (0.05–0.13)                                                      | 0.3018                |
|                               | LRG, μg/mL               | 12.3 (8.9–14.1)              | 14.1 (12.1–16.5)                                                       | 11.7 (9.3–13.5)                                                       | 0.0105                |
|                               | CDAI                     | 67 (29.5–89.8)               | 85 (29–106)                                                            | 66 (30–85)                                                            | 0.1680                |

The data are median (interquartile range). Alb: albumin, CDAI: Crohn's Disease Activity Index, CDACE: Crohn's Disease Activity in Capsule Endoscopy, CECDAI: Capsule Endoscopy Crohn's Disease Activity Index, CRP: C-reactive protein, Hb: hemoglobin, Ht: hematocrit, IQR; inter quartile range, SBCE: small-bowel capsule endoscopy.

**Supplementary Table S2.** Comparison of the patients with and without Lewis score  $\geq 350$

|                               |             | <b>Total<br/><i>n</i>=40</b> | <b>Presence of Lewis<br/>score <math>\geq 350</math><br/><i>n</i>=5</b> | <b>Absence of Lewis<br/>score <math>&lt; 350</math><br/><i>n</i>=35</b> | <b><i>p</i>-value</b> |
|-------------------------------|-------------|------------------------------|-------------------------------------------------------------------------|-------------------------------------------------------------------------|-----------------------|
|                               | Lewis score | 0 (0–192)                    | 3503 (1589–3585)                                                        | 0 (0–135)                                                               | $<0.0001$             |
| SBCE score                    | CECDAI      | 3 (0–6)                      | 12 (6.5–15.5)                                                           | 3 (0–6)                                                                 | 0.0028                |
|                               | CDACE       | 211 (0–420)                  | 831 (312–1042)                                                          | 210 (0–420)                                                             | 0.0106                |
| SB Ulcer $\geq 0.5$ cm (%)    |             | 11 (27.5)                    | 5 (100)                                                                 | 1 (17.1)                                                                | 0.0007                |
| Biomarkers/clinical activity: |             |                              |                                                                         |                                                                         |                       |
| Hb, g/dL                      |             | 13.7 (12.2–14.7)             | 13.1 (11.7–14.4)                                                        | 13.7 (12.2–14.7)                                                        | 0.5394                |
| Plt $\times 10^4/\mu\text{L}$ |             | 24.6 (21.1–29.2)             | 24.7 (20.7–32)                                                          | 24.5 (21.1–28.5)                                                        | 0.5531                |
| Alb, g/dL                     |             | 4.4 (4.2–4.7)                | 4.2 (3.9–4.3)                                                           | 4.5 (4.2–4.7)                                                           | 0.0318                |
| CRP, mg/dL                    |             | 0.08 (0.05–0.15)             | 0.09 (0.07–0.26)                                                        | 0.08 (0.05–0.15)                                                        | 0.3892                |
| LRG, $\mu\text{g/mL}$         |             | 12.3 (8.9–14.1)              | 15.3 (14.4–17.3)                                                        | 11.7 (9.7–13.6)                                                         | 0.0030                |
| CDAI                          |             | 67 (29.5–89.8)               | 106 (88–125)                                                            | 65 (28–85)                                                              | 0.0069                |

The data are median (interquartile range). Abbreviations are explained in the footnote of Supplementary Table S1.

**Supplementary Table S3.** Comparison with LRG  $\geq 16$   $\mu\text{g/ml}$  as the cutoff

|                                                 |                               | <b>Total<br/><i>n</i>=40</b> | <b>LRG <math>\geq 16</math> <math>\mu\text{g/ml}</math><br/><i>n</i>=5</b> | <b>LRG <math>&lt; 16</math> <math>\mu\text{g/ml}</math><br/><i>n</i>=35</b> | <b><i>p</i>-value</b> |
|-------------------------------------------------|-------------------------------|------------------------------|----------------------------------------------------------------------------|-----------------------------------------------------------------------------|-----------------------|
|                                                 | Lewis score                   | 0 (0–192)                    | 196 (90–2092.5)                                                            | 0 (0–135)                                                                   | 0.0270                |
| SBCE score                                      | CECDAI                        | 3 (0–6)                      | 12 (5–15)                                                                  | 3 (0–6)                                                                     | 0.0090                |
|                                                 | CDACE                         | 211 (0–420)                  | 730 (371–1042)                                                             | 210 (0–420)                                                                 | 0.0044                |
| Presence of small bowel ulcer $\geq 0.5$ cm (%) |                               | 11 (27.5)                    | 3 (60)                                                                     | 8 (22.9)                                                                    | 0.1171                |
| Lewis score $\geq 350$ (%)                      |                               | 5 (12.5)                     | 2 (40)                                                                     | 3 (8.6)                                                                     | 0.1088                |
| Biomarkers/clinical activity:                   |                               |                              |                                                                            |                                                                             |                       |
|                                                 | Hb, g/dL                      | 13.7 (12.2–14.7)             | 14.5 (12.8–14.8)                                                           | 13.7 (12.1–14.7)                                                            | 0.4867                |
|                                                 | Plt $\times 10^4/\mu\text{L}$ | 24.6 (21.1–29.2)             | 28 (24.4–30.8)                                                             | 23.6 (20.7–29.4)                                                            | 0.1706                |
|                                                 | Alb, g/dL                     | 4.4 (4.2–4.7)                | 4.3 (3.9–4.5)                                                              | 4.4 (4.2–4.7)                                                               | 0.1732                |
|                                                 | CRP, mg/dL                    | 0.08 (0.05–0.15)             | 0.21 (0.07–0.38)                                                           | 0.08 (0.05–0.14)                                                            | 0.0927                |
|                                                 | LRG, $\mu\text{g/mL}$         | 12.3 (8.9–14.1)              | 16.8 (16.5–17.6)                                                           | 11.7 (9.7–13.6)                                                             | 0.0004                |
|                                                 | CDAI                          | 67 (29.5–89.8)               | 85 (81–104)                                                                | 65 (28–89)                                                                  | 0.0599                |

The data are median (interquartile range). Abbreviations are explained in the footnote of Supplementary Table S1.

**Supplementary Table S4.** Comparison by use of biologics

|                                                 |                               | <b>Total<br/><i>n</i>=40</b> | <b>Biologics (-)<br/><i>n</i>=15</b> | <b>Biologics (+)<br/><i>n</i>=25</b> | <b><i>p</i>-value</b> |
|-------------------------------------------------|-------------------------------|------------------------------|--------------------------------------|--------------------------------------|-----------------------|
|                                                 | Lewis score                   | 0 (0–192)                    | 0 (0 – 225)                          | 0 [0 - 135]                          | 0.6071                |
| SBCE score                                      | CECDAI                        | 3 (0–6)                      | 6 (3 – 10)                           | 3 [0 – 4]                            | 0.0224                |
|                                                 | CDACE                         | 211 (0–420)                  | 420 (210 – 730)                      | 210 [0 - 311]                        | 0.0357                |
| Presence of small bowel ulcer $\geq 0.5$ cm (%) |                               | 11 (27.5)                    | 4 (26.7)                             | 7 (28)                               | 1.0000                |
| Lewis score $\geq 350$ (%)                      |                               | 5 (12.5)                     | 2 (13.3)                             | 3 (12)                               | 1.0000                |
| Biomarkers/clinical activity:                   |                               |                              |                                      |                                      |                       |
|                                                 | Hb, g/dL                      | 13.7 (12.2–14.7)             | 13.8 (12.1 – 14.7)                   | 13.7 [12.3 – 14.7]                   | 1.0000                |
|                                                 | Plt $\times 10^4/\mu\text{L}$ | 24.6 (21.1–29.2)             | 25 (22.3 – 30.5)                     | 23.6 [20.9 – 28.1]                   | 0.2697                |
|                                                 | Alb, g/dL                     | 4.4 (4.2–4.7)                | 4.4 (4.2 – 4.7)                      | 4.3 [4.2 – 4.8]                      | 0.9775                |
|                                                 | CRP, mg/dL                    | 0.08 (0.05–0.15)             | 0.1 (0.07 – 0.21)                    | 0.08 [0.05 – 0.14]                   | 0.1572                |
|                                                 | LRG, $\mu\text{g/mL}$         | 12.3 (8.9–14.1)              | 13.9 (11.7 – 14.4)                   | 10.8 [9.5 – 13.3]                    | 0.0314                |
|                                                 | CDAI                          | 67 (29.5–89.8)               | 83 (28 – 106)                        | 66 [30 – 86]                         | 0.2883                |

Biologics (TNF inhibitor: *n*=20, Ustekinumab: *n*=4, Vedolizumab: *n*=1)

The data are median (interquartile range). Abbreviations are explained in the footnote of Supplementary Table S1.
